# Supplementary material for: Insight into the Molecular Mechanism of Flower Color Regulation in Rhododendron latoucheae Franch: A Multi-Omics Approach
Source: MDPI journal article supplement (doi:10.3390/plants12162897), 2023-08-08
Supplement: s1 [file s1]

# Insight into the molecular mechanism of flower color regulation in *Rhododendron latoucheae*.

## 1. Materials and Methods

**Table S1.** Reaction conditions required for qRT-PCR experiments.

| Reaction step                                       | Name of reactants              | Dose of reactants | Reaction temperature | Reaction time | Number of cycles |
|-----------------------------------------------------|--------------------------------|-------------------|----------------------|---------------|------------------|
| <b>DNA removal reaction system</b>                  | 4×gDNA wiper Mix               | 4 µl              |                      |               |                  |
|                                                     | Total RNA                      | ≤2ug              |                      |               |                  |
|                                                     | RNase-Free ddH <sub>2</sub> O  | 16 µl             |                      |               |                  |
| <b>Reverse transcription reaction system</b>        | Previous step                  | 16 µl             |                      |               |                  |
|                                                     | Reaction solution              |                   |                      |               |                  |
|                                                     | 5×HiScript                     | 4 µl              |                      |               |                  |
|                                                     | 2 x ChamQ SYBR qPCR Master Mix | 10 µl             |                      |               |                  |
| <b>Fluorescent quantitative PCR reaction system</b> | PCR Forward Primer (10µM)      | 0.4µl             |                      |               |                  |
|                                                     | PCR Reverse Primer (10µM)      | 0.4µl             |                      |               |                  |
|                                                     | cDNA templates                 | 4µl               |                      |               |                  |
|                                                     | ddH <sub>2</sub> O             | 5.2µl             |                      |               |                  |
| <b>PCR reaction conditions</b>                      |                                |                   | 95°C                 | 90s           | 1 cycle          |
|                                                     |                                |                   | 95°C                 | 05s           |                  |
|                                                     |                                |                   | 60°C                 | 15s           | 40 cycles        |
|                                                     |                                |                   | 72°C                 | 20s           |                  |

## 2. Results

### 2.1 Key metabolite extraction results and analysis

#### 2.1.2 Effect of flavonoid metabolites on flower color

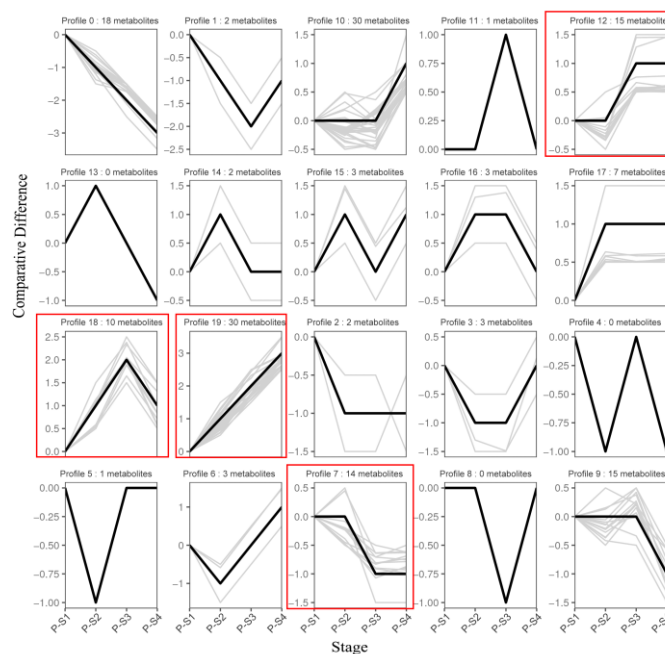

Figure S1. Trends of Flavonoid Differential Metabolites in Purple *Rhododendron latoucheae*.

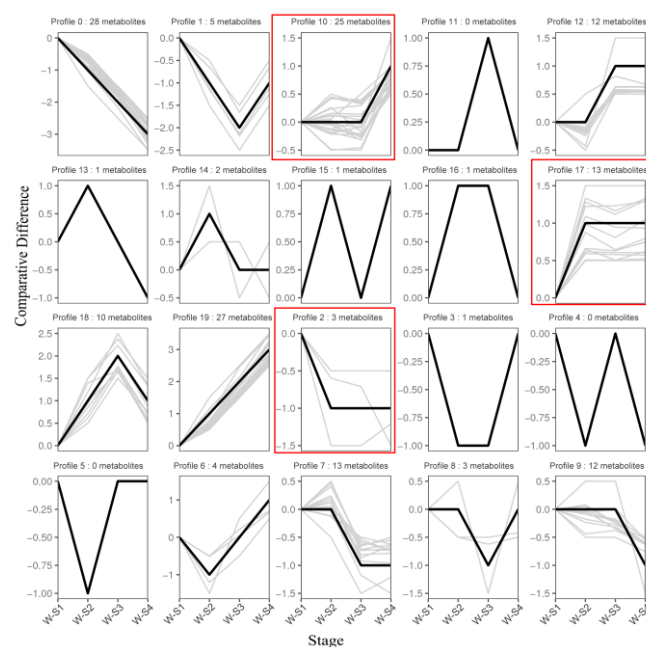

Figure S2. Trends of Flavonoid Differential Metabolites in White-pink *Rhododendron latoucheae*.

### 2.1.3 Effect of anthocyanins on flower color

**Table S2.** Vip and Log2(FC) statistics of Different Anthocyanins of *Rhododendron latoucheae*.

| Period | Differential expression of anthocyanins | Vip   | Log2 (FC) | P-value  |
|--------|-----------------------------------------|-------|-----------|----------|
| S1     | Malvain-3-O-galactoside                 | 1.332 | 1.559     | 0.039033 |
|        | Malvain-3-O-glucoside                   | 1.250 | 1.853     | 0.028523 |
|        | Cyanidin-3,5-dio-O-glucoside            | 1.960 | -0.708    | 0.028234 |
|        | Petunidin-3-O-glucoside-5-O-arabinoside | 1.606 | -0.888    | 0.027852 |
| S2     | Cyanidin-3,5-diglucoside                | 1.622 | -0.461    | 0.013715 |
|        | Petunidin-3-O-glucoside-5-O-arabinoside | 1.180 | -0.58     | 0.016069 |
|        | Cyanidin-3-O-glucoside                  | 1.714 | 1.025     | 0.001837 |
|        | Peonidin-3-O-glucoside                  | 2.672 | 1.219     | 0.000120 |
| S3     | Malvain-3-O-galactoside                 | 7.964 | 1.475     | 0.001915 |
|        | Malvain-3-O-glucoside                   | 7.021 | 1.491     | 0.001788 |
|        | Peonidin-3-O-sambubioside               | 1.091 | 0.711     | 0.000569 |
|        | Petunidin-3-O-glucoside-5-O-arabinoside | 1.392 | -1.366    | 0.002296 |
|        | Peonidin-3,5-O-diglucoside              | 2.006 | 0.492     | 0.040067 |
|        | Peonidin-3-O-glucoside                  | 1.701 | 0.769     | 0.009190 |
| S4     | Malvain-3-O-galactoside                 | 6.932 | 1.638     | 0.001409 |
|        | Malvain-3-O-glucoside                   | 5.897 | 1.686     | 0.000653 |
|        | Pelargonidin-3,5-diglucoside            | 1.541 | -3.402    | 0.012412 |
|        | Malvain-3-O-rutinoside                  | 1.807 | 1.715     | 0.004927 |

Note: S1 indicates the difference of anthocyanins between white-pink and purple in S1; S2 indicates the difference of anthocyanins between white-pink and purple in S2; S3 indicates the difference of anthocyanins between white-pink and purple in S3; S4 indicates the difference of anthocyanins between white pink and purple in S4.

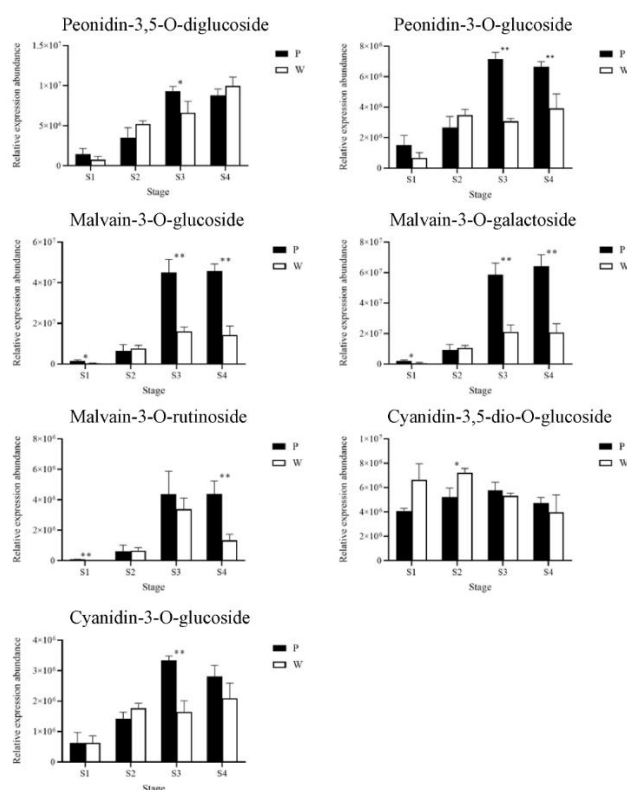

**Figure S3.** Anthocyanin content in *Rhododendron latoucheae*.

2.2 Key gene and key pathway assay results and analysis

Table S3. Composition of Bases and their Quality Values.

| Sample Name | Raw data | High quality data | Efficient | Q20    | Q30    | GC     |
|-------------|----------|-------------------|-----------|--------|--------|--------|
| P-S1-1      | 60755986 | 60497876          | 99.58%    | 98.06% | 94.43% | 47.06% |
| P-S1-2      | 77351984 | 76977452          | 99.52%    | 97.99% | 94.30% | 46.87% |
| P-S1-3      | 87691336 | 87176030          | 99.41%    | 98.05% | 94.43% | 46.70% |
| P-S2-1      | 67875730 | 67585518          | 99.57%    | 97.87% | 94.11% | 47.45% |
| P-S2-2      | 79686488 | 79300920          | 99.52%    | 97.97% | 94.29% | 47.10% |
| P-S2-3      | 62984518 | 62592442          | 99.38%    | 97.99% | 94.34% | 47.09% |
| P-S3-1      | 63536168 | 63201344          | 99.47%    | 98.14% | 94.69% | 47.32% |
| P-S3-2      | 62874682 | 62492418          | 99.39%    | 97.99% | 94.33% | 47.26% |
| P-S3-3      | 71747226 | 71325652          | 99.41%    | 98.05% | 94.48% | 47.38% |
| P-S4-1      | 76461986 | 76099408          | 99.53%    | 97.95% | 94.23% | 47.92% |
| P-S4-2      | 71250166 | 70861956          | 99.46%    | 97.90% | 94.06% | 47.61% |
| P-S4-3      | 63961332 | 63594726          | 99.43%    | 98.07% | 94.44% | 47.62% |
| W-S1-1      | 74582028 | 74161362          | 99.44%    | 98.00% | 94.31% | 46.56% |
| W-S1-2      | 57008170 | 56666256          | 99.40%    | 98.02% | 94.37% | 46.81% |
| W-S1-3      | 68544564 | 68083132          | 99.33%    | 98.13% | 94.63% | 46.59% |
| W-S2-1      | 83038308 | 82591174          | 99.46%    | 97.94% | 94.20% | 47.30% |
| W-S2-2      | 92853624 | 92365018          | 99.47%    | 98.07% | 94.50% | 46.94% |
| W-S2-3      | 64931440 | 64583974          | 99.46%    | 98.07% | 94.47% | 46.52% |
| W-S3-1      | 76649534 | 76252436          | 99.48%    | 97.98% | 94.32% | 47.21% |
| W-S3-2      | 80612170 | 80076266          | 99.34%    | 97.96% | 94.29% | 47.20% |
| W-S3-3      | 66233998 | 65858110          | 99.43%    | 97.99% | 94.34% | 47.16% |
| W-S4-1      | 81079882 | 80731066          | 99.57%    | 98.06% | 94.45% | 47.23% |
| W-S4-2      | 63464100 | 63120286          | 99.46%    | 98.11% | 94.56% | 47.18% |
| W-S4-3      | 64368302 | 64097102          | 99.58%    | 98.14% | 94.69% | 47.45% |

Note: The effective rate is the ratio of cleandata to the original data, and Q20 is the percentage of the number of bases with the quality value of sequencing bases above Q20 in cleandata; Q30 is the percentage of the number of bases whose sequencing base quality value reaches the level above q30 in cleandata; GC% is the percentage of GC content in cleandata.

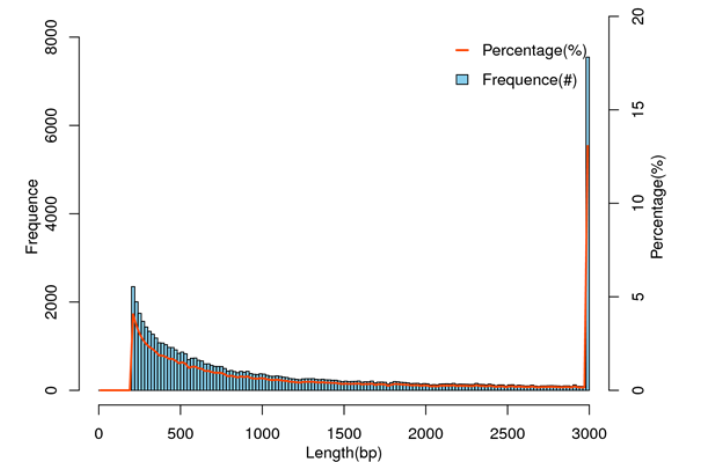

Figure S4. Unigene Length Distribution.

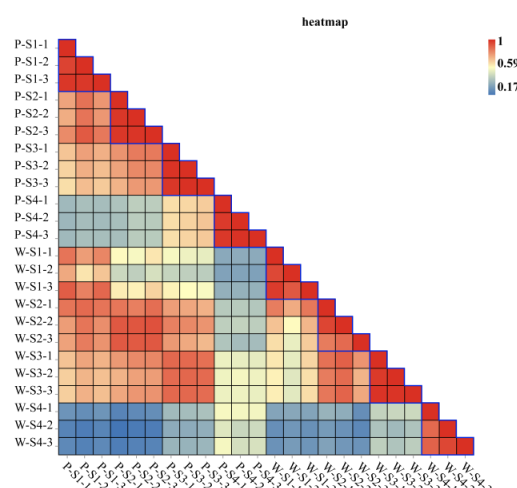

**Figure S5.** Heat Map of Correlation for Each Sample. The FPKM values were used to indicate the expression of each gene of *R. latoucheae*. And by calculating the pearson correlation coefficient of FPKM values of the samples, the correlation heat map of the samples was plotted.

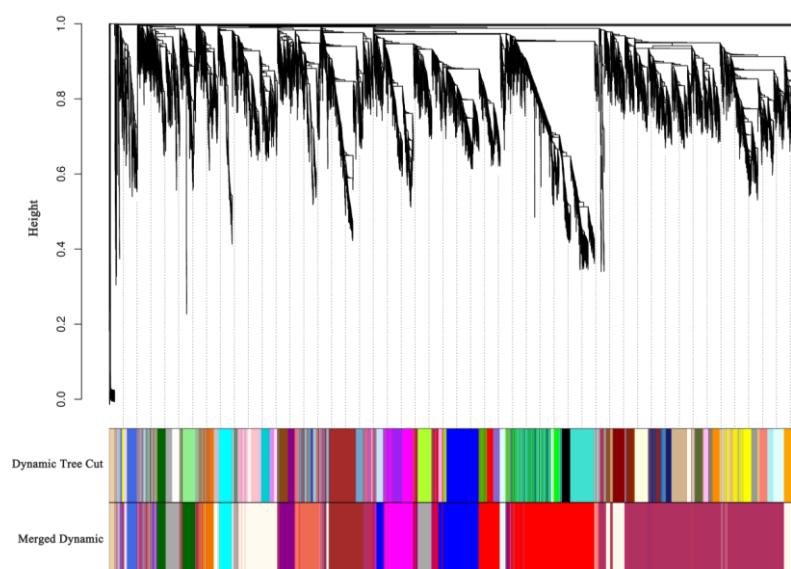

**Figure S6.** Module Level Clustering Diagram.

**Table S4.** Anthocyanin and Flavonoid Synthesis-related Unigene Log2 (FC) values.

| ID             | Symbol       | S1(log2(FC)) | S2(log2(FC)) | S3(log2(FC)) | S4(log2(FC)) |
|----------------|--------------|--------------|--------------|--------------|--------------|
| Unigene0011575 | CYP76C1      | 0.36         | -0.88        | -3.46        | -3.93        |
| Unigene0011577 | CYP75B137    | -1.57        | -1.00        | -1.34        | 0.46         |
| Unigene0020093 | TOGT1        | -2.77        | -1.87        | -0.57        | 0.94         |
| Unigene0011575 | CYP76C1      | 0.14         | -0.88        | -3.46        | -3.93        |
| Unigene0018707 | TKPR1        | -0.99        | -1.43        | -0.78        | -2.22        |
| Unigene0023540 | MYB12        | 0.38         | 8.99         | 4.83         | 3.15         |
| Unigene0037903 | CHS1         | -1.67        | -0.8         | -1.38        | -0.5         |
| Unigene0039403 | GT5          | 1.07         | -2.33        | -11.63       | -13.18       |
| Unigene0045101 | F3H-2        | -1.5         | -0.77        | -1.04        | -0.08        |
| Unigene0047699 | CHS          | -2.18        | -1.77        | -2.97        | -1.05        |
| Unigene0048513 | RHM1         | 0.72         | 0.76         | 1.88         | 2.97         |
| Unigene0036583 | Os02g0190300 | 0.17         | -1.28        | 3.2          | 1.84         |

**Table S5.** Heat Map of Correlation between Floral Traits and Each Module.

| Module Name     | L        | a         | b        | c         |
|-----------------|----------|-----------|----------|-----------|
| MM.navajowhite2 | 0.030    | 0.105     | -0.147   | -0.082    |
| MM.coral2       | -0.306   | 0.485*    | -0.506*  | 0.088     |
| MM.magenta      | 0.150    | 0.177     | -0.325   | -0.265    |
| MM.darkorange2  | -0.253   | 0.082     | 0.054    | 0.195     |
| MM.brown        | -0.194   | -0.308    | 0.397    | 0.286     |
| MM.blue         | -0.462*  | -0.044    | 0.312    | 0.566**   |
| MM.lightcyan1   | -0.577** | 0.195     | 0.014    | 0.127     |
| MM.darkgreen    | -0.55**  | 0.59**    | -0.485*  | 0.264     |
| MM.darkgrey     | -0.179   | 0.32      | -0.191   | 0.046     |
| MM.cyan         | 0.469*   | 0.135     | -0.287   | -0.61**   |
| MM.red          | 0.589**  | -0.149    | -0.148   | -0.664*** |
| MM.royalblue    | -0.22    | -0.234    | 0.35     | 0.218     |
| MM.thistle1     | -0.125   | -0.206    | 0.35     | 0.31      |
| MM.coral1       | 0.546**  | -0.527**  | 0.472*   | -0.06     |
| MM.maroon       | -0.095   | -0.593**  | 0.817*** | 0.706***  |
| MM.darkmagenta  | 0.546**  | -0.726*** | 0.659    | 0.063     |
| MM.floralwhite  | 0.179    | -0.32*    | 0.430    | 0.245     |
| MM.grey         | -0.175   | 0.122     | -0.019   | 0.039     |

Note: \*indicates  $P < 0.05$ , \*\* indicates  $P < 0.01$ , \*\*\* indicates  $P < 0.001$

**Table S6.** Unigene Related to Flavonoid in the Maroon Module.

| Pathway                         | Gene ID        | Gene Name        |
|---------------------------------|----------------|------------------|
| ko00941(Flavonoid biosynthesis) | Unigene0002596 | <i>RIFAOMT</i>   |
|                                 | Unigene0012061 | <i>RICYP75A1</i> |
|                                 | Unigene0016387 | <i>RIANR</i>     |
|                                 | Unigene0027133 | <i>RILAR</i>     |
|                                 | Unigene0033582 | <i>RILDOX</i>    |
|                                 | Unigene0033619 | <i>RICHI3</i>    |
|                                 | Unigene0037903 | <i>RICH51</i>    |
|                                 | Unigene0041684 | <i>RIHST</i>     |
|                                 | Unigene0043745 | <i>RICHI</i>     |
|                                 | Unigene0045101 | <i>RIF3H-2</i>   |
|                                 | Unigene0045102 | <i>RIF3H</i>     |
|                                 | Unigene0046184 | <i>RIF3H-2</i>   |
|                                 | Unigene0046185 | <i>RIAN3</i>     |
|                                 | Unigene0046651 | <i>RIFLS</i>     |
|                                 | Unigene0047699 | <i>RICH5</i>     |
|                                 | Unigene0047773 | <i>RICYP75A1</i> |
|                                 | Unigene0052283 | <i>RIFLS</i>     |
|                                 | Unigene0053894 | <i>RICH51</i>    |

## 2.3 Metabolite regulation analysis

**Table S7.** The Correlation of MYB1, MYB3, MYB4, MYB12 and Key Metabolites.

| Genes | Metabolites             | Metabolite Class | Correlation coefficient | p-value  |
|-------|-------------------------|------------------|-------------------------|----------|
| MYB1  | Malvain-3-O-glucoside   | Anthocyanidin    | -0.70                   | 0.000163 |
|       | Malvain-3-O-galactoside | Anthocyanidin    | -0.69                   | 0.000179 |

|       |                         |               |       |          |
|-------|-------------------------|---------------|-------|----------|
| MYB3  | Dihydromyricetin        | Flavanonol    | 0.79  | 0.000005 |
|       | Peonidin-3-O-glucoside  | Anthocyanidin | -0.71 | 0.000104 |
|       | Gallocatechin           | Flavanoid     | 0.63  | 0.001104 |
|       | Malvain-3-O-glucoside   | Anthocyanidin | -0.53 | 0.007198 |
|       | Malvain-3-O-galactoside | Anthocyanidin | -0.54 | 0.006355 |
| MYB12 | Dihydromyricetin        | Flavanonol    | 0.72  | 0.000065 |
|       | Peonidin-3-O-glucoside  | Anthocyanidin | -0.58 | 0.003103 |
|       | Malvain-3-O-glucoside   | Anthocyanidin | 0.64  | 0.000790 |
|       | Malvain-3-O-galactoside | Anthocyanidin | 0.68  | 0.000266 |
|       | Peonidin-3-O-glucoside  | Anthocyanidin | 0.55  | 0.005056 |

**Table S8.** The Transcription Factors *RIMYB12*, *RIMYB1*, *RIMYB17*, *RIMYB315*, *RlbHLH93* and *RlbHLH96* are Correlated with Key Metabolites.

| Genes           | Metabolites            | Correlation coefficient | P value  |
|-----------------|------------------------|-------------------------|----------|
| <i>RIMYB17</i>  | Dihydromyricetin       | 0.75                    | 0.000026 |
|                 | Gallocatechin          | 0.67                    | 0.000378 |
| <i>RLMYB315</i> | Malvain-3-O-glucoside  | -0.75                   | 0.000028 |
|                 | Peonidin-3-O-glucoside | -0.74                   | 0.000035 |
| <i>RIMYB12</i>  | Malvain-3-O-glucoside  | 0.68                    | 0.000266 |
|                 | Peonidin-3-O-glucoside | 0.55                    | 0.005056 |
|                 | Malvain-3-O-glucoside  | -0.70                   | 0.000163 |
| <i>RIMYB1</i>   | Dihydromyricetin       | 0.79                    | 0.000005 |
|                 | Peonidin-3-O-glucoside | -0.71                   | 0.000104 |
|                 | Malvain-3-O-glucoside  | -0.62                   | 0.001266 |
| <i>RlbHLH93</i> | Dihydromyricetin       | 0.78                    | 0.000008 |
|                 | Peonidin-3-O-glucoside | -0.73                   | 0.000054 |
|                 | Gallocatechin          | 0.56                    | 0.004381 |
| <i>RlbHLH96</i> | Dihydromyricetin       | 0.69                    | 0.000176 |
|                 | Peonidin-3-O-glucoside | -0.66                   | 0.000501 |

3. Discussion

3.1 Key genes and key metabolite regulatory relationships

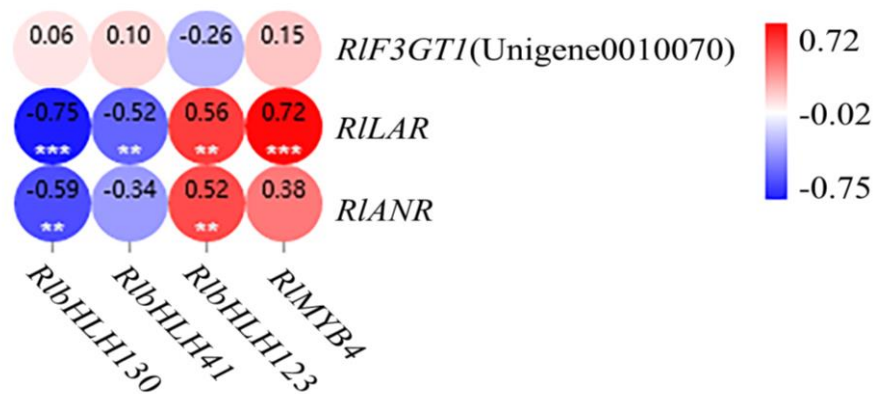

**Figure S7.** Heat map of Correlation between Key Structural Genes and Key Transcription Factors. note: \*indicates P < 0.05, \*\* indicates P < 0.01, \*\*\* indicates P < 0.001.
